# Supplementary material for: Cost-effectiveness of a national enterovirus 71 vaccination program in China
Source: PubMed Central journal article supplement (PMC5608421; doi:10.1371/journal.pntd.0005899), 2017-09-11
Supplement: pntd.0005899.s003.pdf [file pntd.0005899.s003.pdf]

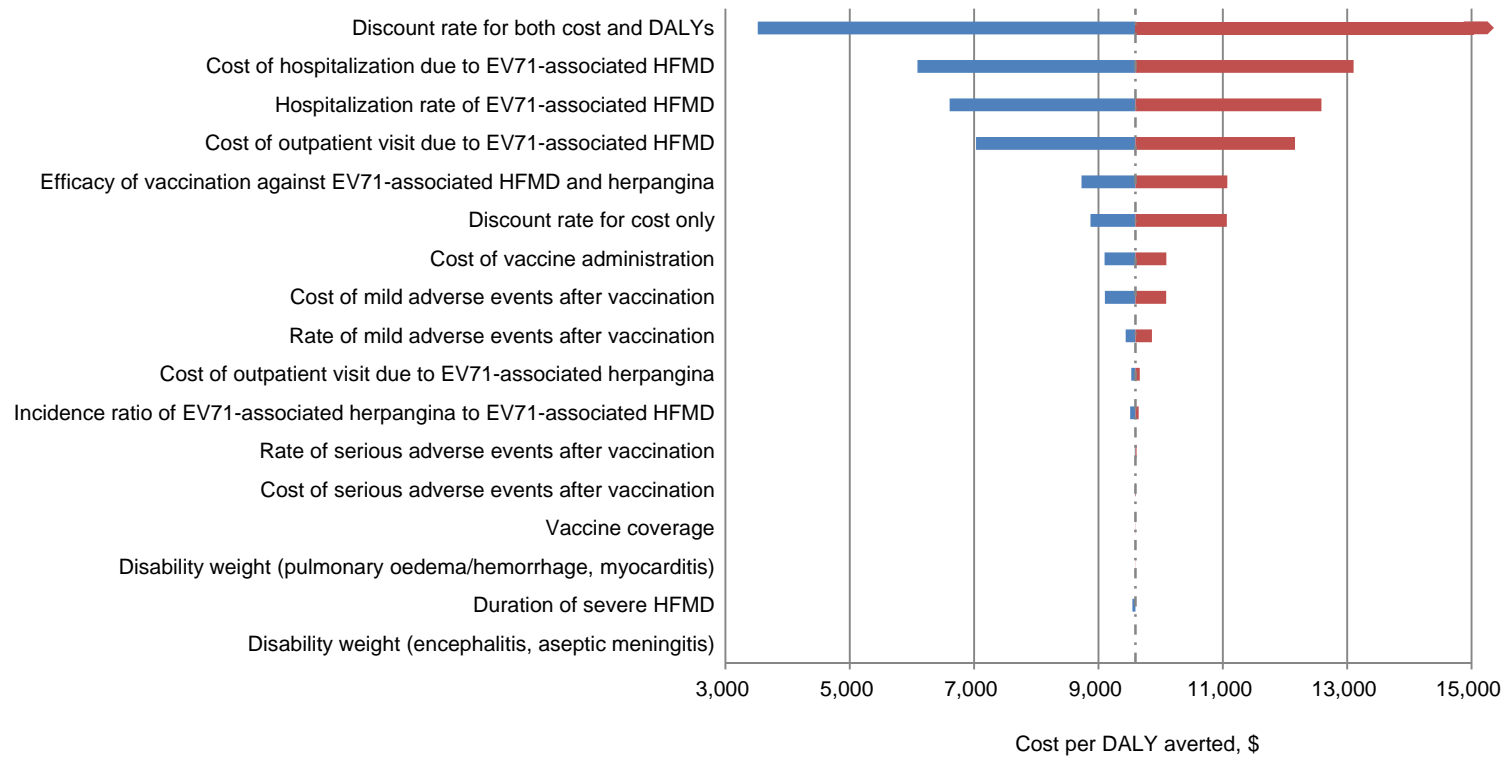

Tornado diagram of univariate sensitivity analyses for EV71 vaccination versus no vaccination at the price per dose of \$10. HFMD: hand, foot and mouth disease; EV71: enterovirus 71; DALYs: disability adjusted life years.

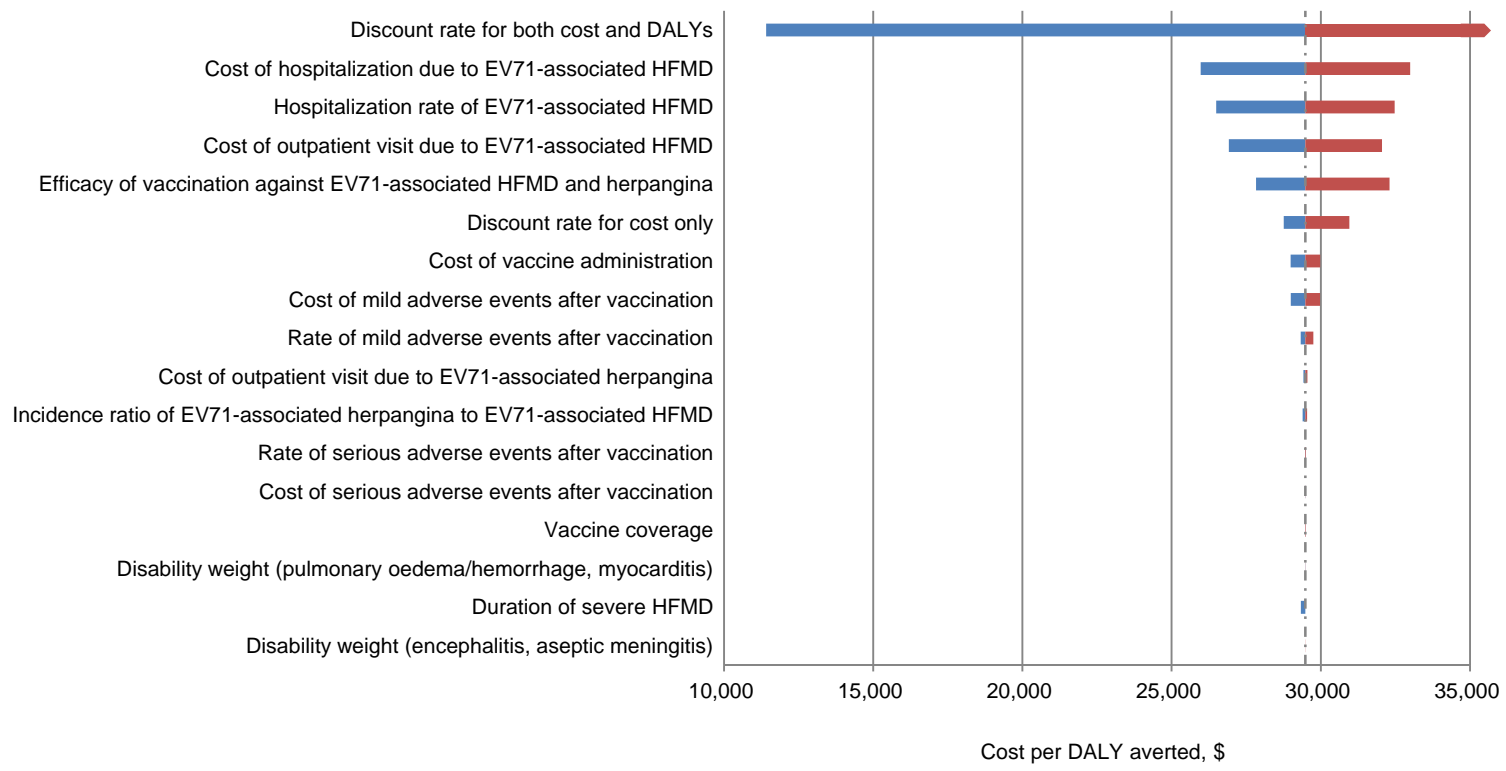

Tornado diagram of univariate sensitivity analyses for EV71 vaccination versus no vaccination at the price per dose of \$20. HFMD: hand, foot and mouth disease; EV71: enterovirus 71; DALYs: disability adjusted life years.

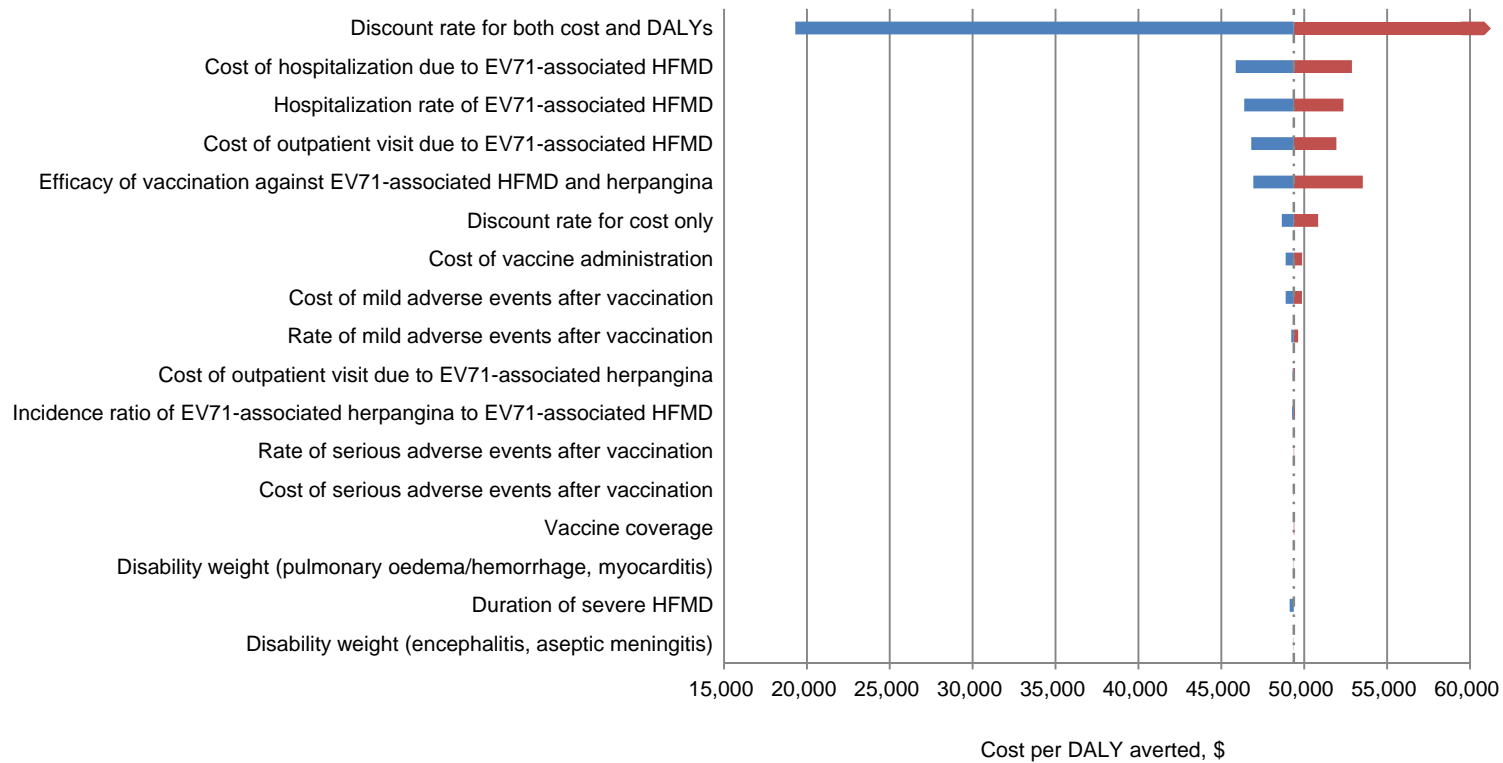

Tornado diagram of univariate sensitivity analyses for EV71 vaccination versus no vaccination at the price per dose of \$30. HFMD: hand, foot and mouth disease; EV71: enterovirus 71; DALYs: disability adjusted life years.

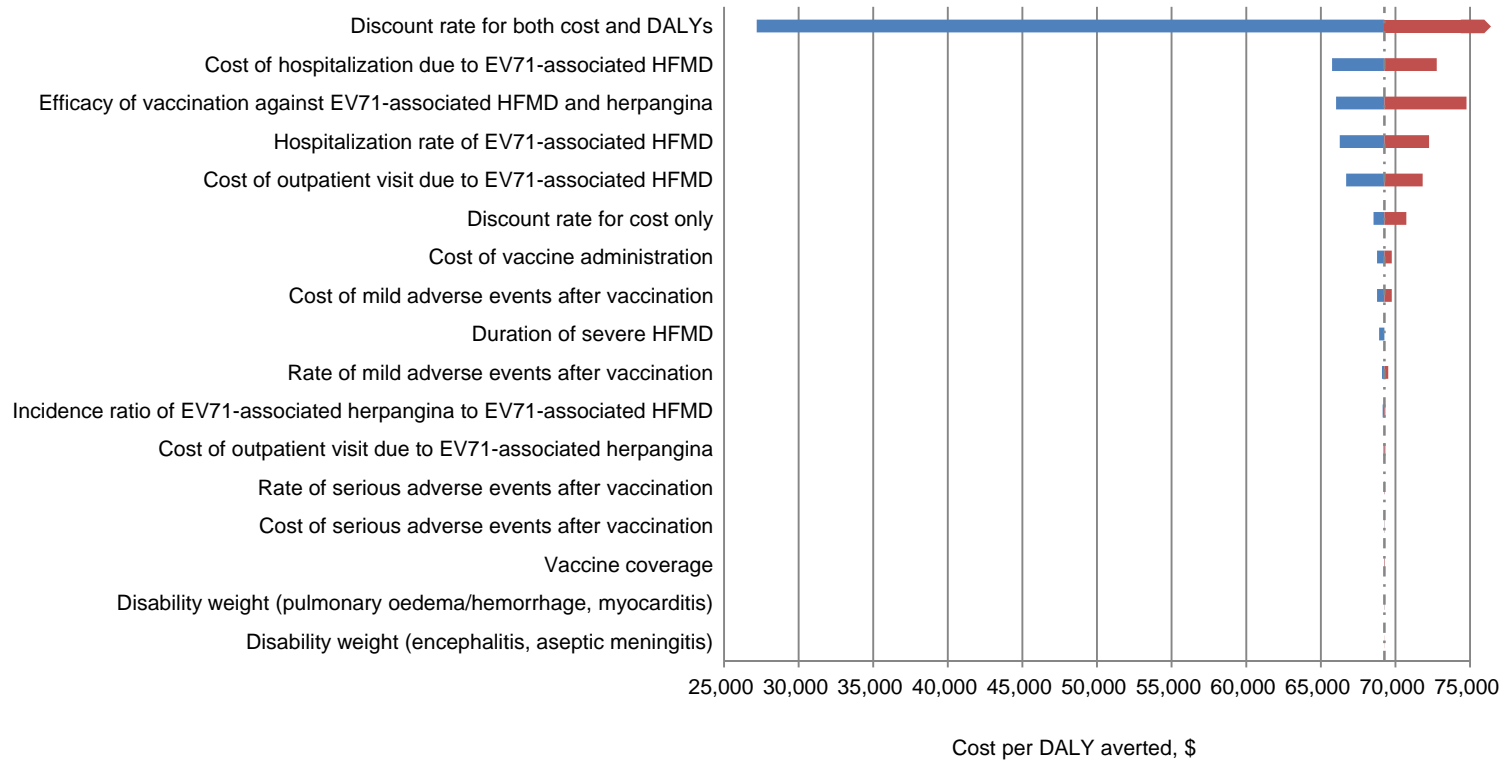

Tornado diagram of univariate sensitivity analyses for EV71 vaccination versus no vaccination at the price per dose of \$40. HFMD: hand, foot and mouth disease; EV71: enterovirus 71; DALYs: disability adjusted life years.
